# Supplementary material for: Gender-specific association between carbohydrate consumption and blood pressure in Chinese adults
Source: HighWire-hosted journal article supplement (doi:10.1136/bmjnph-2020-000165), 2021-01-13
Supplement: bmjnph-2020-000165supp001_data_supplement.pdf [file bmjnph-2020-000165supp001_data_supplement.pdf]

**Supplemental Table 1 Baseline characteristics by gender among 2241 rural participants**

| Characteristics                        | Men    | Women  | <i>P</i> * |
|----------------------------------------|--------|--------|------------|
| No. of subjects                        | 774    | 1467   |            |
| Age, y                                 | 49.5   | 47.3   | <0.001     |
| Schooling year >9 years, %             | 17.3   | 8.7    | <0.001     |
| Fortune index in rich, %               | 37.0   | 38.4   | 0.781      |
| Current drinker, %                     | 68.1   | 17.5   | <0.001     |
| Current smoker, %                      | 66.3   | 0.9    | <0.001     |
| Physical activity in high intensity, % | 61.3   | 66.5   | 0.051      |
| BMI, kg/m <sup>2</sup>                 | 22.5   | 22.5   | 0.938      |
| WC, cm                                 | 80.5   | 76.9   | <0.001     |
| Food intake, g/d§                      |        |        |            |
| Grain                                  | 605.8  | 465    | <0.001     |
| Red meat                               | 33.3   | 21.4   | <0.001     |
| Vegetables                             | 305.7  | 246.7  | <0.001     |
| Fruits                                 | 11.7   | 17.6   | 0.005      |
| Nutrient intake§                       |        |        |            |
| Energy, kcal/d                         | 2054.2 | 1605.8 | <0.001     |
| Fat, g/d                               | 73.6   | 66.7   | <0.001     |
| Protein, g/d                           | 50.6   | 38.2   | <0.001     |
| Cholesterol, mg/d                      | 167.7  | 133.4  | <0.001     |
| Sodium, mg/d                           | 4982.2 | 4899.1 | <0.001     |
| Fiber, g/d                             | 6.6    | 5.2    | <0.001     |

Values were mean or %

\* *P* value was assessed by t-test or Mann-Whitney U test for continuous variables and by chi-square test for categorical variables

§ Adjusted for total calorie intake, except energy daily intake.

**Supplemental Table 2. Estimated blood pressure changes (mmHg) with one SD increment of energy percentage from carbohydrate based on different multiple linear regression models \* §**

|        | Model   | SBP                        |          | DBP                        |          |
|--------|---------|----------------------------|----------|----------------------------|----------|
|        |         | $\beta$ -estimates (95%CI) | <i>P</i> | $\beta$ -estimates (95%CI) | <i>P</i> |
| Male   | Model 1 | 1.28(-0.02-2.57)           | 0.053    | 0.50(-0.19-1.19)           | 0.153    |
|        | Model 2 | 0.61(-0.67-1.89)           | 0.353    | 0.39(-0.34-1.11)           | 0.298    |
|        | Model 3 | 0.62(-0.63-1.88)           | 0.329    | 0.34(-0.37-1.06)           | 0.344    |
|        | Model 4 | 0.96(-0.50-2.43)           | 0.196    | 0.43(-0.41-1.26)           | 0.316    |
| Female | Model 1 | 2.17(1.19-3.14)            | <0.001   | 0.98(0.47-1.48)            | <0.001   |
|        | Model 2 | 1.87(0.90-2.83)            | <0.001   | 1.13(0.59-1.66)            | <0.001   |
|        | Model 3 | 1.86(0.92-2.81)            | <0.001   | 1.10(0.58-1.62)            | <0.001   |
|        | Model 4 | 2.18(1.05-3.32)            | <0.001   | 1.31(0.69-1.94)            | <0.001   |

\* one SD of energy percentage from carbohydrate (% E) was 12.1% in male and 11.5% in female.

§ Model adjustments: Model 1: adjusted for energy. Model 2: model 1 and further adjusted for age, education, fortune index and family history of hypertension. Model 3: model 2 and further adjusted for BMI, physical activity level, alcohol intake and smoke. Model 4: model 3 and further adjusted two nutrient principal components, protein and sodium intake.

**Supplemental Table 3. Estimated blood pressure changes (mmHg) with additional 50g/d increment of carbohydrate intake based on different multiple linear regression models (N=2893) \***

|        | Model   | SBP                        |          | DBP                        |          |
|--------|---------|----------------------------|----------|----------------------------|----------|
|        |         | $\beta$ -estimates (95%CI) | <i>P</i> | $\beta$ -estimates (95%CI) | <i>P</i> |
| Male   | Model 1 | 1.85(0.64-3.06)            | 0.003    | 0.60(-0.26-1.23)           | 0.060    |
|        | Model 2 | 0.58(-0.60-1.77)           | 0.335    | 0.41(-0.24-1.05)           | 0.214    |
|        | Model 3 | 0.56(-0.59-1.71)           | 0.336    | 0.39(-0.23-1.01)           | 0.222    |
|        | Model 4 | 1.21(-0.10-2.15)           | 0.605    | 0.51(-0.17-1.09)           | 0.083    |
| Female | Model 1 | 2.65(1.75-3.56)            | <0.001   | 1.00(0.56-1.44)            | <0.001   |
|        | Model 2 | 1.37(0.53-2.21)            | 0.001    | 0.73(0.29-1.17)            | 0.001    |
|        | Model 3 | 1.48(0.65-2.31)            | <0.001   | .078(0.33-1.20)            | 0.001    |
|        | Model 4 | 2.12(1.16-3.08)            | <0.001   | 1.17(0.67-1.68)            | <0.001   |

\* Model adjustments were consistent with **supplemental table 1**.
